# Supplementary material for: Impaired Cognitive Function and Altered Hippocampal Synapse Morphology in Mice Lacking Lrrtm1, a Gene Associated with Schizophrenia
Source: PLOS journal article supplement (doi:10.1371/journal.pone.0022716), 2011-07-27
Supplement: S1 (10.1371/journal.pone.0022716.s001) [file journal.pone.0022716.s001]

**Table S1 Summary of *Lrrtm1* KO behavioral analysis**

| test                                    |                                 | result             | statistical significance and notes |
|-----------------------------------------|---------------------------------|--------------------|------------------------------------|
| home-cage activity                      | no. of count by infrared sensor | reduced activity   | **, in early dark phase            |
| open field, 70 lx                       | locomotor                       | no change          | older mice, decreased              |
|                                         | % time in corner                | no change          | older mice, increased              |
| open field, 250 lx                      | locomotor                       | decreased          | *                                  |
|                                         | % time in corner                | slightly increased |                                    |
| light-dark box                          | % time in light box             | no change          |                                    |
|                                         | no. of transitions              | decreased          | *                                  |
|                                         | latency entering dark box       | increased          | *                                  |
|                                         | total distance                  | no change          |                                    |
| elevated plus maze                      | % time in open arm              | increased          | *                                  |
|                                         | % entries to open arm           | increased          | *                                  |
|                                         | total distance                  | no change          |                                    |
| hole-board                              | head-dip latency                | increased          | **                                 |
|                                         | total distance                  | slightly decreased |                                    |
|                                         | rearing time                    | no change          |                                    |
|                                         | rearing number                  | no change          |                                    |
|                                         | head-dip time                   | no change          |                                    |
|                                         | head-dip number                 | no change          |                                    |
| inanimate object approach               | large object contact time       | decreased          | *                                  |
|                                         | small object contact time       | no change          |                                    |
| novel object recognition                | no. of contacts (training)      | increased          | ***                                |
|                                         | no. of contacts (test)          | no change          |                                    |
|                                         | preference index                | no change          |                                    |
| social interaction in novel environment | contact score                   | no change          |                                    |
| resident-intruder                       | investigation                   | no change          |                                    |
|                                         | attack                          | slightly decreased |                                    |
| social recognition of caged mouse       | approach to cage                | decreased          | **                                 |
|                                         | investigation: novel            | no change          |                                    |

|                                     |                                                                         |           |   |
|-------------------------------------|-------------------------------------------------------------------------|-----------|---|
|                                     | investigation: familiar                                                 | increased | * |
| water maze                          | distance swum on day 1                                                  | increased | * |
|                                     | no movement time                                                        | no change |   |
|                                     | latency reaching goal                                                   | no change |   |
|                                     | probe test of time in quadrant                                          | decreased | * |
|                                     | probe test of crossing                                                  | decreased | * |
|                                     | rearing after goal reached                                              | increased |   |
|                                     | diving                                                                  | increased |   |
| fear conditioning -<br>conditioning | freezing response before<br>unconditioned stimulus                      | increased | * |
|                                     | freezing response after<br>unconditioned stimulus (tone +<br>footshock) | no change |   |
| fear conditioning -<br>context      | freezing response                                                       | increased | * |
| fear conditioning - cue             | freezing response before<br>conditioned stimulus                        | increased | * |
|                                     | freezing response after<br>conditioned stimulus (tone cue)              | increased | * |
| rotarod                             | time stayed on rotating rod                                             | no change |   |
| tail suspension                     | immobility time                                                         | no change |   |
| forced swimming                     | immobility time                                                         | no change |   |
| hotplate                            | latency licking forepaws                                                | no change |   |
|                                     | latency flinching hindpaws                                              | no change |   |
| tail flick                          | latency removing tail                                                   | no change |   |
| acoustic startle<br>response        | startle response amplitude                                              | no change |   |
|                                     | prepulse inhibition                                                     | no change |   |
| marble burying                      | % area of marbles buried                                                | no change |   |
|                                     | no. of marbles buried                                                   | no change |   |

Statistical significance indicates the difference between WT and KO, \*  $P < 0.05$ ; \*\* $P < 0.01$ ; \*\*\* $P < 0.001$ .
